# Supplementary figures and images for: Influence of 24 h Simulated Altitude on Red Blood Cell Deformability and Hematological Parameters in Patients with Fontan Circulation
Source: MDPI journal article supplement (doi:10.3390/metabo12111025), 2022-10-26

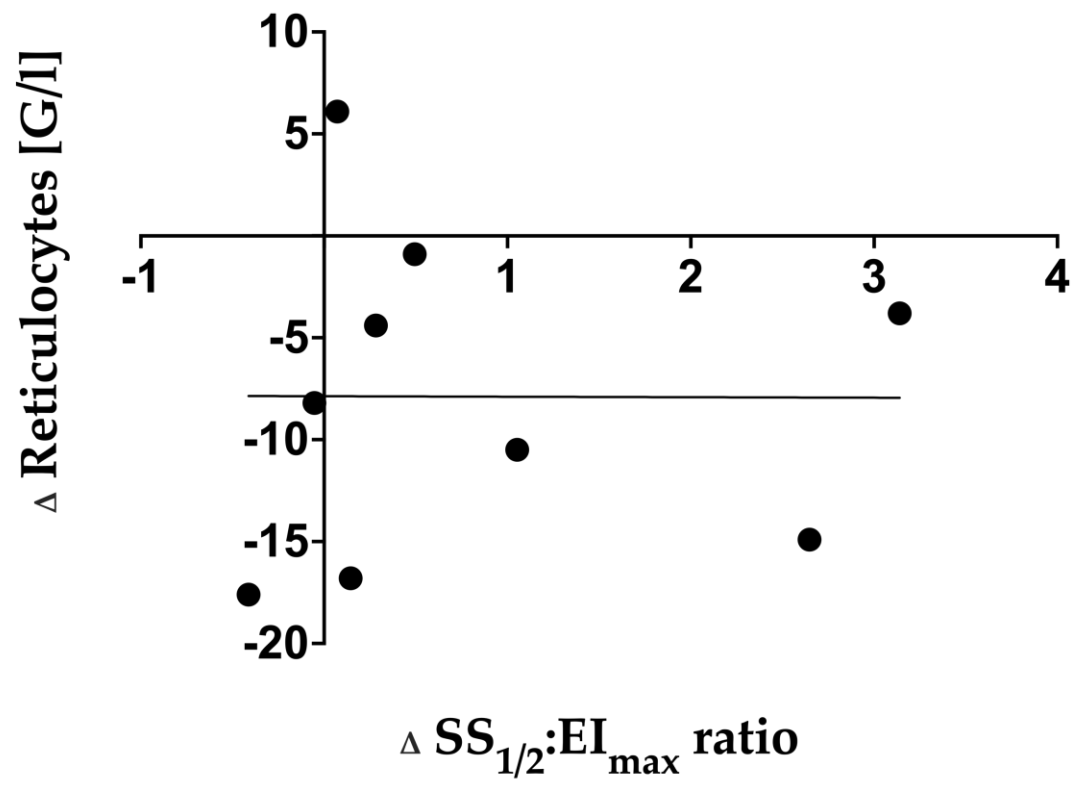

**Figure S1.** Correlation of  $\Delta$  reticulocyte count and  $\Delta SS_{1/2}:EI_{\max}$  ratio (n = 9).

Supplement: s1 [file s1]
